# Supplementary material for: Investigation on chloro-bridged binuclear copper(ii) complexes as potent metallodrug candidates against colon cancer via chemical and biological assessments
Source: Royal Society of Chemistry journal article supplement (doi:10.1039/d3nj05335k), 2024-01-01
Supplement: d3nj05335k1.pdf [file d3nj05335k1.pdf]

## Supplementary Information

### Synthesis of precursor complex [Cu(DMSO)<sub>2</sub>Cl<sub>2</sub>]

Copper(II) chloride (300 mg) is placed in an Erlenmeyer flask (25 mL) with a magnetic stirrer bar. A calibrated Pasteur pipette is used to add absolute ethanol (2 mL) to the flask and stirred it well until it gets dissolved. To this mixture, DMSO (0.5 mL) is added slowly and immediate formation of light green precipitate occurred. The crystals were separated, washed with ethanol and dried <sup>1</sup>.

Yield: 88 %; melting point: 225 °C.

### Synthesis of ligands

Ligands were prepared following the literature procedure (shown in scheme 1). Equimolar mixture of solutions of benzoyl pyridine and hydrazides in ethanol were refluxed for 4-6 h. After completion of the reaction, which is confirmed by TLC the reaction mixture is poured in to crush ice. The obtained precipitate was separated out, washed, dried and recrystallised from ethanol. Ligand **HL1** was obtained from condensation of benzoyl pyridine (0.183 g, 1 mM) with 2-thiophene carboxylic acid hydrazide (0.142, 1 mM) in ethanol (30 mL) medium. The **HL2** was prepared by reacting benzoyl pyridine (0.183 g, 1 mM) with salicyl hydrazide (0.152 g, 1 mM) dissolved in ethanol. Benzoyl pyridine (0.183 g, 1 mM) refluxed with ethanolic solution of 2-hydroxy-3-naphthoic hydrazide (0.202 g, 1 mM) about 4 h produce **HL3**. Ethanolic solution of benzoyl pyridine (0.183 g, 1 mM) and o-toluic hydrazide (0.150 g, 1 mM) refluxed for 6 h, reaction arrested by adding in to crush ice, formed white precipitate is **HL4**. Ligand **HL5** obtained by reacting equimolar quantities of benzoyl pyridine (0.183 g, 1 mM) and nicotinic acid hydrazide (0.137 g, 1 mM) <sup>2,3</sup>.

**HL1**: Colour: off white.; Yield: 78 %; melting point: 129-134 °C.; Elemental analysis: Found (calculated) (%) for C<sub>17</sub>H<sub>13</sub>N<sub>3</sub>OS: C, 66.43 (66.32); H, 4.26 (4.59); N, 13.67 (13.41); S, 10.43 (10.55).; UV-visible (solvent: Tris-HCl buffer, nm): (ε, M<sup>-1</sup> cm<sup>-1</sup>): 242 (38459); IR: (KBr, ν<sub>max</sub> cm<sup>-1</sup>): 3025 (N-H); 1641 (C=O); 1581(C=N); 1075 (N-N).

**HL2**: Colour: white; Yield: 71 %; melting point: 224 °C.; Elemental analysis: Found (calculated) (%) for C<sub>19</sub>H<sub>15</sub>N<sub>3</sub>O<sub>3</sub>: C, 76.02 (71.91); H, 3.21 (4.76); N, 12.88 (13.24); UV-visible (solvent: Tris-HCl buffer, nm): (ε, M<sup>-1</sup> cm<sup>-1</sup>): 278 (39569); IR: (KBr, ν<sub>max</sub> cm<sup>-1</sup>): 3145 (N-H); 1668 (C=O); 1579 (C=N); 1097 (N-N).

**HL3:** Colour: dirty white; Yield: 62 %; melting point: 233 °C.; Elemental analysis: Found (calculated) (%) for  $C_{23}H_{17}N_3O_2$ : C, 74.22 (75.19); H, 4.35 (4.66); N, 11.07 (11.44); UV-visible (solvent: Tris-HCl buffer, nm): ( $\epsilon$ ,  $M^{-1} cm^{-1}$ ): 264 (45123); IR: (KBr,  $\nu_{max} cm^{-1}$ ): 3201 (N-H); 1660 (C=O); 1580 (C=N); 1072 (N-N).

**HL4:** Colour: brownish white; Yield: 59 %; melting point: 220 °C.; Elemental analysis: Found (calculated) (%) for  $C_{20}H_{17}N_3O$ : C, 76.52 (76.17); H, 5.20 (5.43); N, 11.89 (13.32); UV-visible (solvent: Tris-HCl buffer, nm): ( $\epsilon$ ,  $M^{-1} cm^{-1}$ ): 259 (50894); IR: (KBr,  $\nu_{max} cm^{-1}$ ): 3060 (N-H); 1680 (C=O); 1575 (C=N); 1084 (N-N).

**HL5:** Colour: dull white; Yield: 64 %; melting point: 212 °C.; Elemental analysis: Found (calculated) (%) for  $C_{18}H_{14}N_4O$ : C, 71.42 (71.51); H, 4.19 (4.67); N, 17.88 (18.53); UV-visible (solvent: Tris-HCl buffer, nm): ( $\epsilon$ ,  $M^{-1} cm^{-1}$ ): 290 (42349); IR: (KBr,  $\nu_{max} cm^{-1}$ ): 3201 (N-H); 1650 (C=O); 1548(C=N); 1112 (N-N).

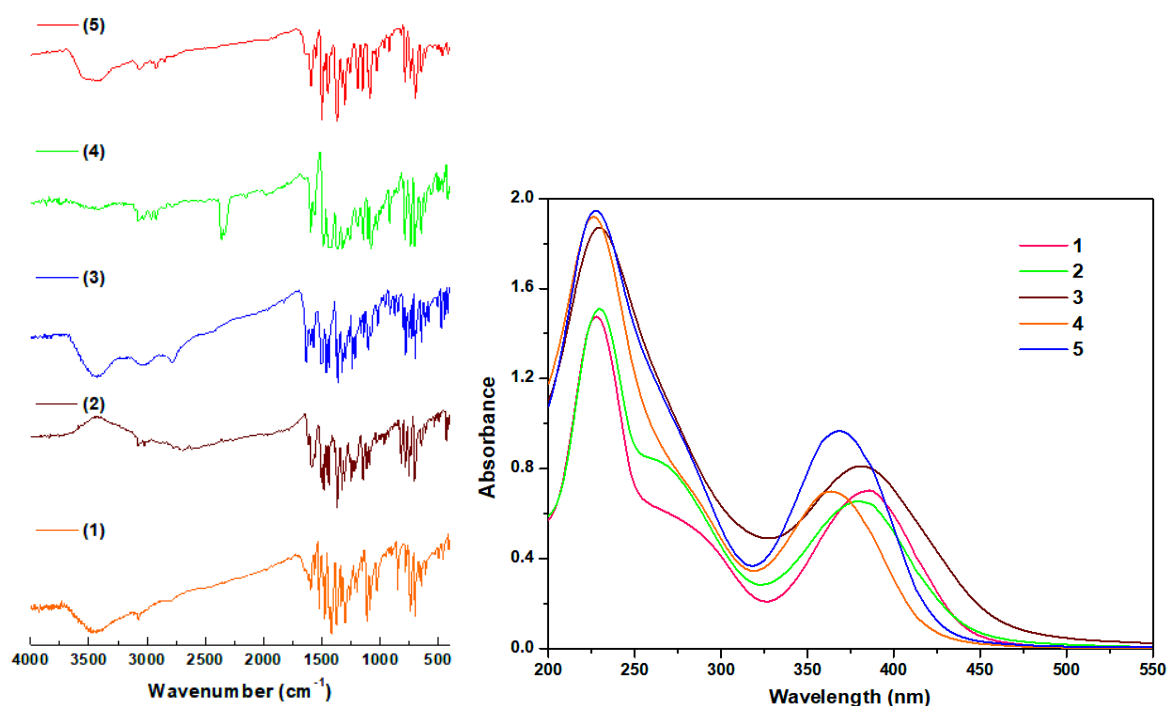

**Fig. S1.** Infrared and UV-visible spectra of copper(II) complexes 1-5.

## ESI Mass Spectra

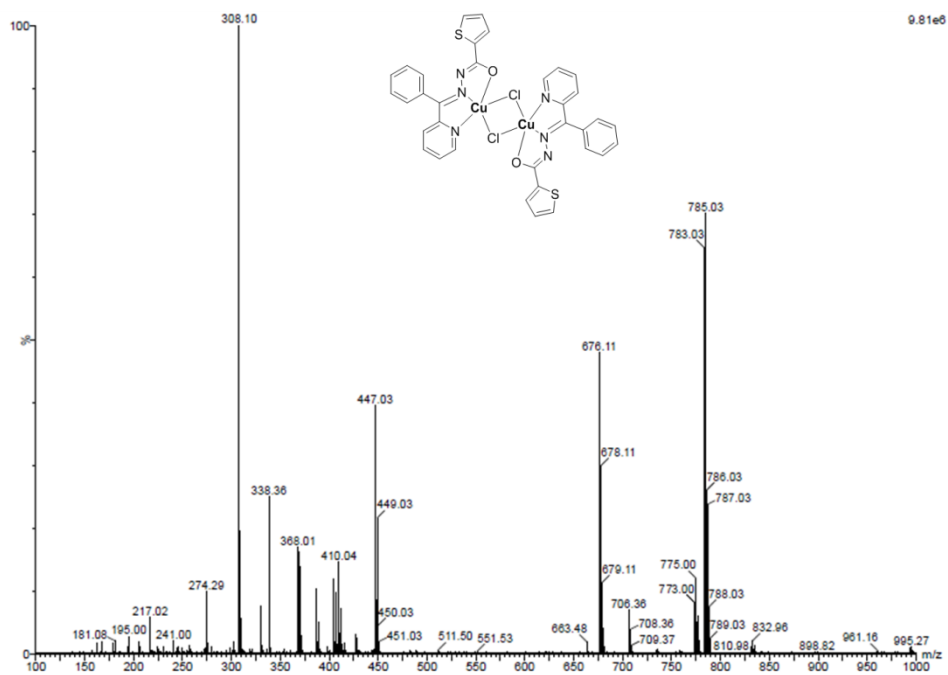

Fig. S2. ESI-MS Spectrum of complex 1

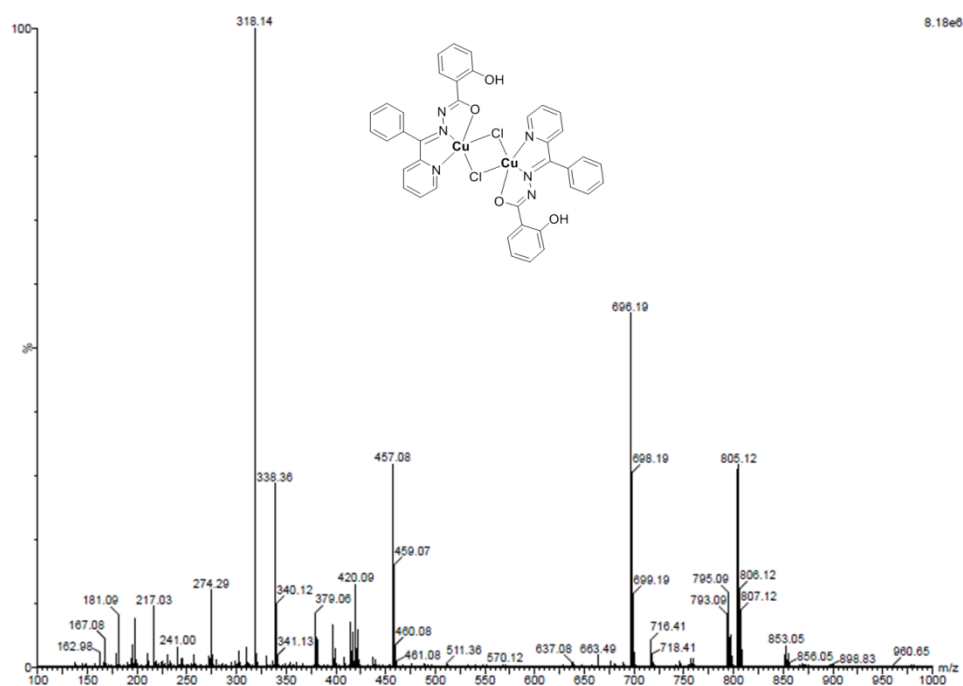

Fig. S3. ESI-MS Spectrum of complex 2

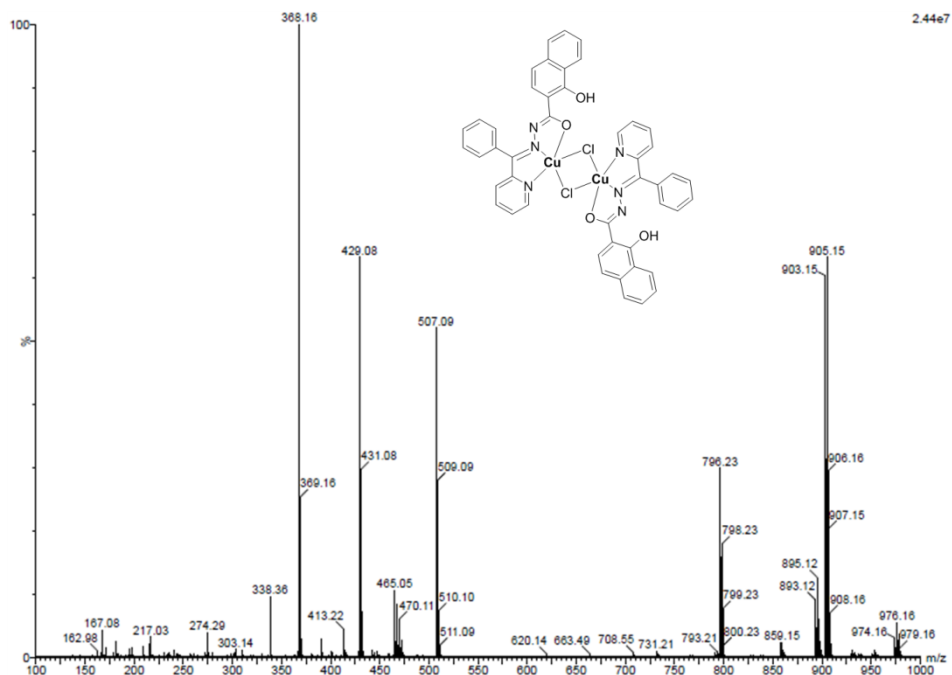

Fig. S4. ESI-MS Spectrum of complex 3

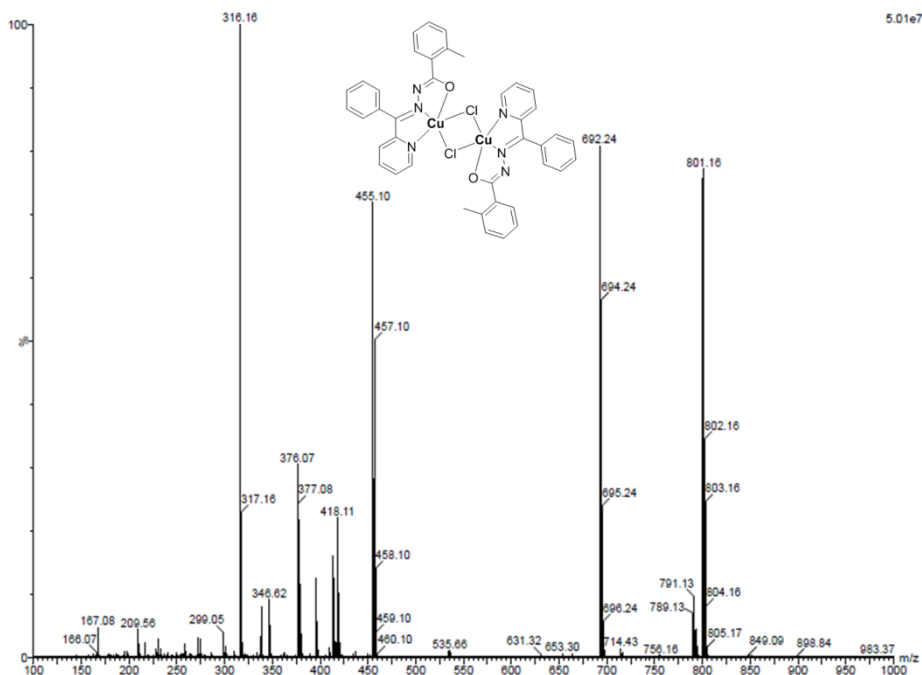

Fig. S5. ESI-MS Spectrum of complex 4

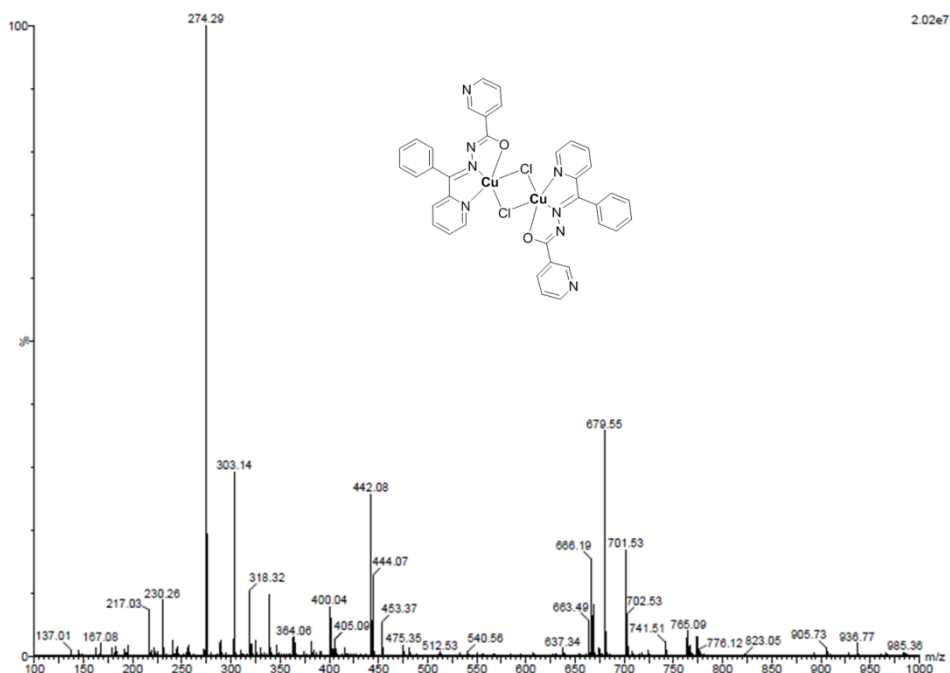

**Fig. S6.** ESI-MS Spectrum of complex **5**

### Crystallographic data of complex 1-5

Green coloured single crystals of complexes **1-5** suitable for single crystal XRD were mounted on a nylon loop, and then placed in a cold nitrogen stream. Crystal screening, unit cell determination and data collection were employed using BRUKER Quest X-ray diffractometer. The goniometer was controlled using the APEX3 software suite. The X-ray radiation was generated from a Mo-I $\mu$ s X-ray tube ( $K_{\alpha}$  = 0.71073 Å). Integrated intensity information for each reflection was obtained by reduction of the data frames with the program APEX3<sup>4</sup>. The integration method employed a three-dimensional profiling algorithm and all data were corrected for Lorentz and polarization factors, as well as for crystal decay effects. Finally the data was merged and scaled to produce a suitable data set. Complex **3** belongs to triclinic crystal system with *P-1* space group while all other four consists of monoclinic crystal system and follow *P121/c1*. The absorption correction program SADABS<sup>5</sup> was employed to correct the data for absorption effects. Appropriate restraints and/or constraints were used to keep the bond distances, angles, and thermal ellipsoids meaningful. Absence of additional symmetry and voids were confirmed using PLATON (ADDSYM)<sup>6</sup>. The structure was refined (weighted least squares refinement on  $F^2$ ) to convergence<sup>7,8</sup>. Olex2 was employed for the final data presentation and structural plots.

**Table S1** Experimental data for crystallographic analysis

|                                             | <b>Complex 1</b>                                                                                             | <b>Complex 2</b>                                                                              | <b>Complex 3</b>                                                                              | <b>Complex 4</b>                                                                              | <b>Complex 5</b>                                                                              |
|---------------------------------------------|--------------------------------------------------------------------------------------------------------------|-----------------------------------------------------------------------------------------------|-----------------------------------------------------------------------------------------------|-----------------------------------------------------------------------------------------------|-----------------------------------------------------------------------------------------------|
| CCDC number                                 | 1834652                                                                                                      | 1834923                                                                                       | 1834075                                                                                       | 1867446                                                                                       | 1856307                                                                                       |
| Empirical formula                           | C <sub>34</sub> H <sub>24</sub> Cl <sub>2</sub> Cu <sub>2</sub> N <sub>6</sub> O <sub>2</sub> S <sub>2</sub> | C <sub>38</sub> H <sub>28</sub> Cl <sub>2</sub> Cu <sub>2</sub> N <sub>6</sub> O <sub>4</sub> | C <sub>46</sub> H <sub>32</sub> Cl <sub>2</sub> Cu <sub>2</sub> N <sub>6</sub> O <sub>4</sub> | C <sub>40</sub> H <sub>32</sub> Cl <sub>2</sub> Cu <sub>2</sub> N <sub>6</sub> O <sub>2</sub> | C <sub>36</sub> H <sub>26</sub> Cl <sub>2</sub> Cu <sub>2</sub> N <sub>8</sub> O <sub>2</sub> |
| Formula weight                              | 810.69                                                                                                       | 830.64                                                                                        | 930.75                                                                                        | 826.69                                                                                        | 800.63                                                                                        |
| Temperature (K)                             | 110.0                                                                                                        | 110.0                                                                                         | 100.0                                                                                         | 100.0                                                                                         | 100.0                                                                                         |
| Wavelength (Å)                              | 0.71073                                                                                                      | 0.71073                                                                                       | 1.54178                                                                                       | 1.54178                                                                                       | 0.71073                                                                                       |
| Crystal system                              | Monoclinic                                                                                                   | Monoclinic                                                                                    | Triclinic                                                                                     | Monoclinic                                                                                    | Monoclinic                                                                                    |
| Space group                                 | P 1 21/c 1                                                                                                   | P 1 21/c 1                                                                                    | P-1                                                                                           | P 1 21/n 1                                                                                    | P 1 21/n 1                                                                                    |
| Unit cell dimensions                        |                                                                                                              |                                                                                               |                                                                                               |                                                                                               |                                                                                               |
| a (Å)                                       | 7.0109(4)                                                                                                    | 10.3698(14)                                                                                   | 8.4356(4)                                                                                     | 11.5354(4)                                                                                    | 9.0207(13)                                                                                    |
| b (Å)                                       | 19.1977(11)                                                                                                  | 21.702(3)                                                                                     | 8.4928(4)                                                                                     | 12.0272(4)                                                                                    | 13.1603(17)                                                                                   |
| c (Å)                                       | 12.0284(7)                                                                                                   | 7.5455(11)                                                                                    | 13.2266(7)                                                                                    | 12.4998(4)                                                                                    | 14.5195(18)                                                                                   |
| α (°)                                       | 90                                                                                                           | 90                                                                                            | 89.690(2)                                                                                     | 90                                                                                            | 90                                                                                            |
| β (°)                                       | 100.064(2)                                                                                                   | 97.017(5)                                                                                     | 83.786(2)                                                                                     | 93.604(2)                                                                                     | 106.049(4)                                                                                    |
| γ (°)                                       | 90                                                                                                           | 90                                                                                            | 85.047(2)                                                                                     | 90                                                                                            | 90                                                                                            |
| Volume (Å <sup>3</sup> )                    | 1594.03(16)                                                                                                  | 1685.4(4)                                                                                     | 938.49(8)                                                                                     | 1730.77(10)                                                                                   | 1656.5(4)                                                                                     |
| Z                                           | 2                                                                                                            | 2                                                                                             | 1                                                                                             | 2                                                                                             | 2                                                                                             |
| Density(calculated)<br>(Mg/m <sup>3</sup> ) | 1.689                                                                                                        | 1.637                                                                                         | 1.647                                                                                         | 1.586                                                                                         | 1.605                                                                                         |
| Abs. coefficient<br>(mm <sup>-1</sup> )     | 1.677                                                                                                        | 1.474                                                                                         | 3.179                                                                                         | 3.314                                                                                         | 1.493                                                                                         |
| Crystal size(mm <sup>3</sup> )              | 0.66 x 0.228 x 0.082                                                                                         | 0.124 x 0.095 x 0.031                                                                         | 0.244 x 0.124 x 0.037                                                                         | 0.048 x 0.024 x 0.021                                                                         | 0.265 x 0.08 x 0.068                                                                          |
| F(000)                                      | 820                                                                                                          | 844                                                                                           | 474                                                                                           | 844                                                                                           | 812                                                                                           |
| Reflections collected                       | 25497                                                                                                        | 26692                                                                                         | 6521                                                                                          | 15257                                                                                         | 18049                                                                                         |
| Independent reflections                     | 2806                                                                                                         | 2969                                                                                          | 6521                                                                                          | 3237                                                                                          | 3794                                                                                          |
| Goodness-of-fit on F <sup>2</sup>           | 1.270                                                                                                        | 1.265                                                                                         | 1.061                                                                                         | 1.069                                                                                         | 1.127                                                                                         |
| Final R indices<br>I>2σ(I)]                 | R1 = 0.0373, wR2 = 0.0728                                                                                    | R1 = 0.0552, wR2 = 0.0964                                                                     | R1 = 0.0305, wR2 = 0.0785                                                                     | R1 = 0.0668, wR2 = 0.1665                                                                     | R1 = 0.0432, wR2 = 0.0705                                                                     |
| R indices (all data)                        | R1 = 0.0504, wR2 = 0.0804                                                                                    | R1 = 0.0714, wR2 = 0.1049                                                                     | R1 = 0.0332, wR2 = 0.0804                                                                     | R1 = 0.0750, wR2 = 0.1760                                                                     | R1 = 0.0665, wR2 = 0.0783                                                                     |

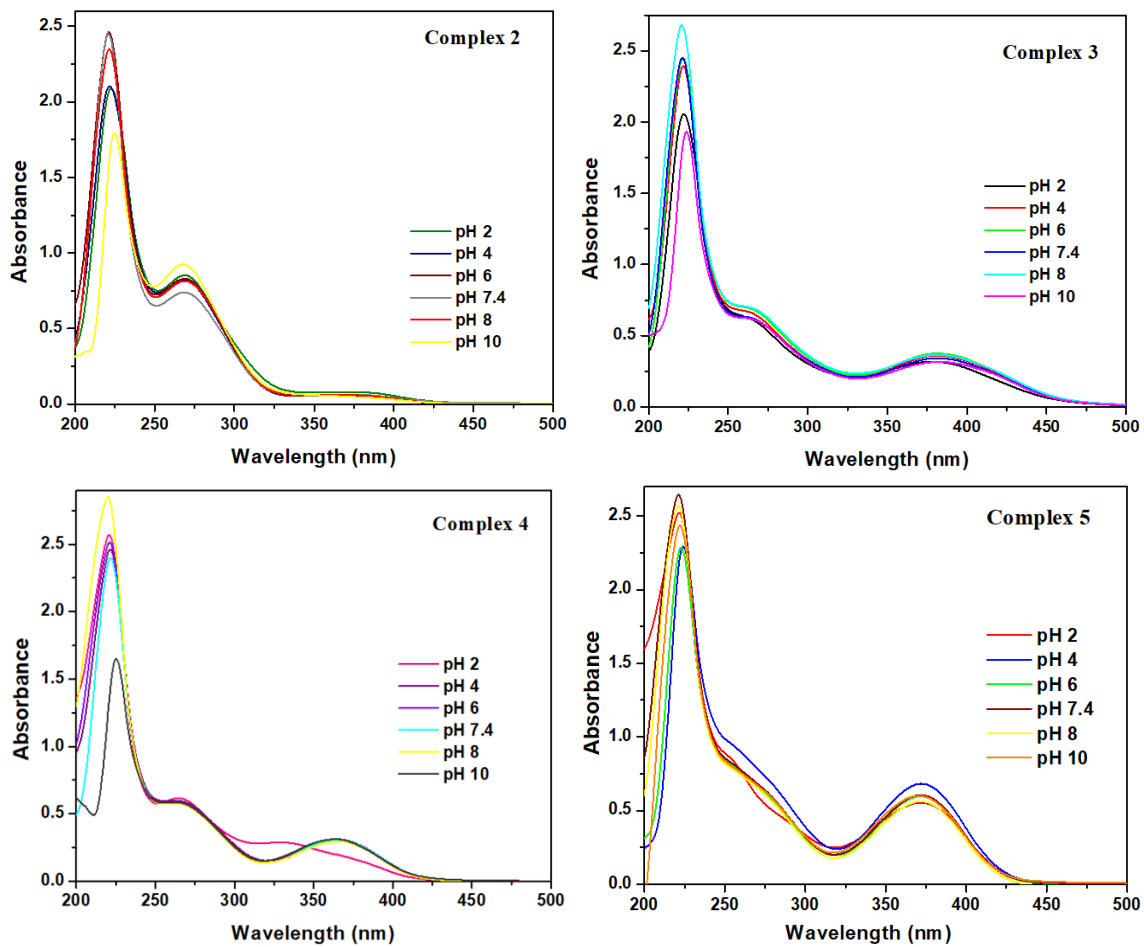

**Fig. S7.** Absorption spectra of complexes 2-5 in various pH PBS buffer

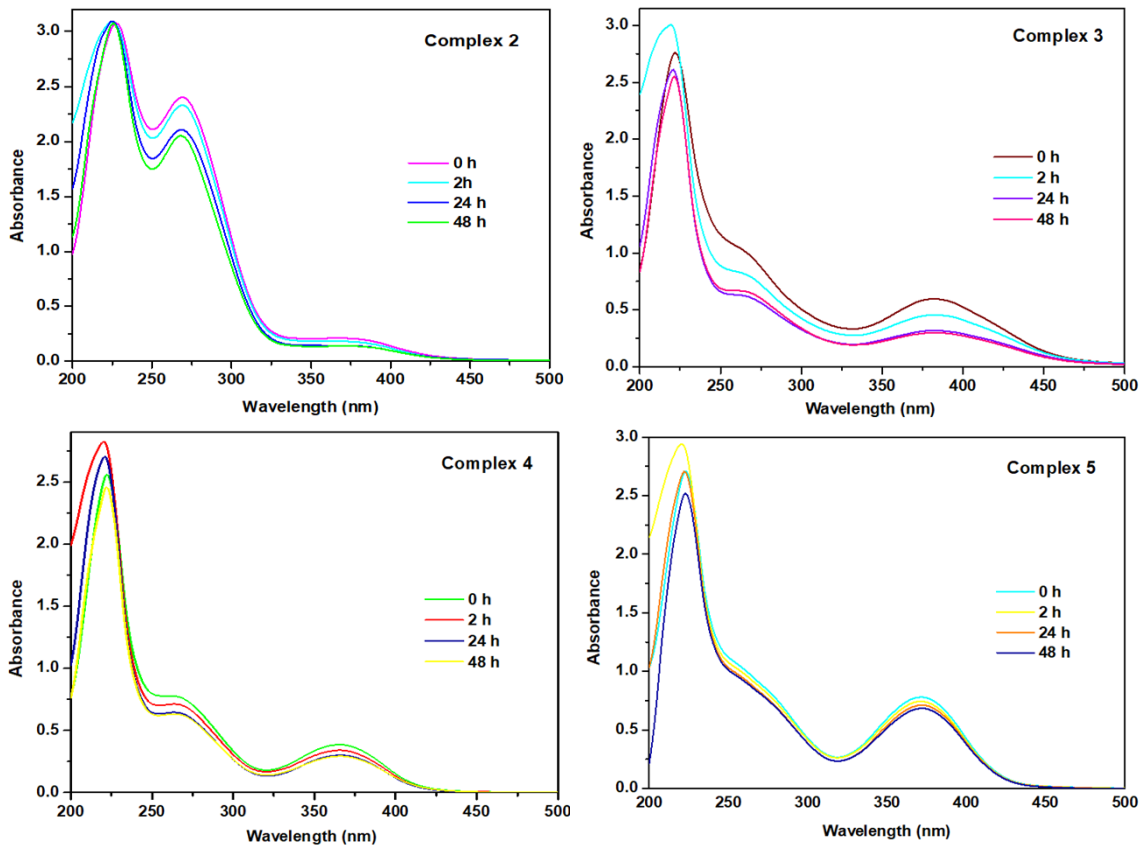

**Fig. S8.** Stability analysis of complexes 2-5 under solution condition by comparing absorption spectra of different time intervals

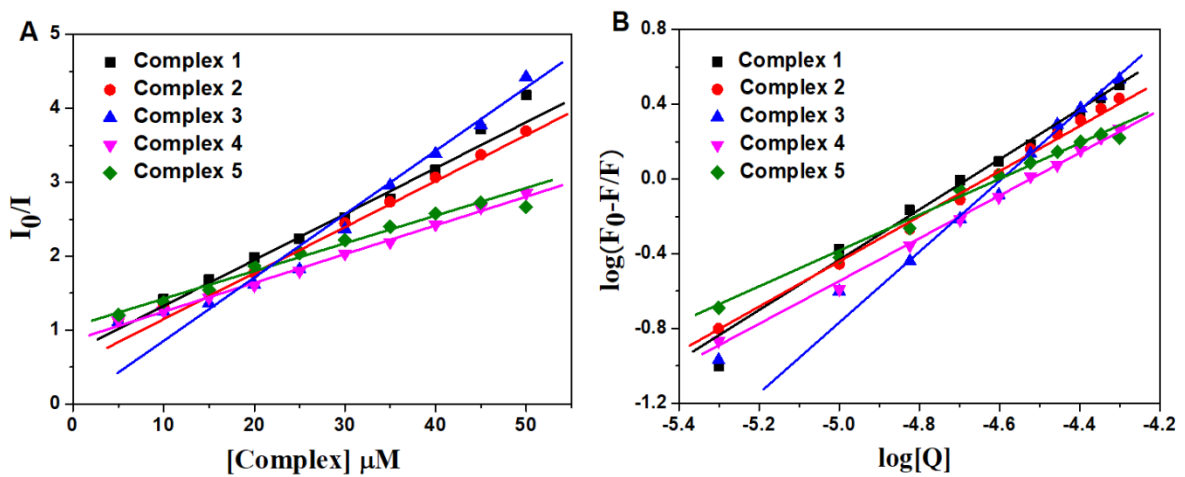

**Fig. S9.** Stern-Volmer plots (A) and Scatchard plots (B) of the fluorescence titrations of BSA with complexes 1-5



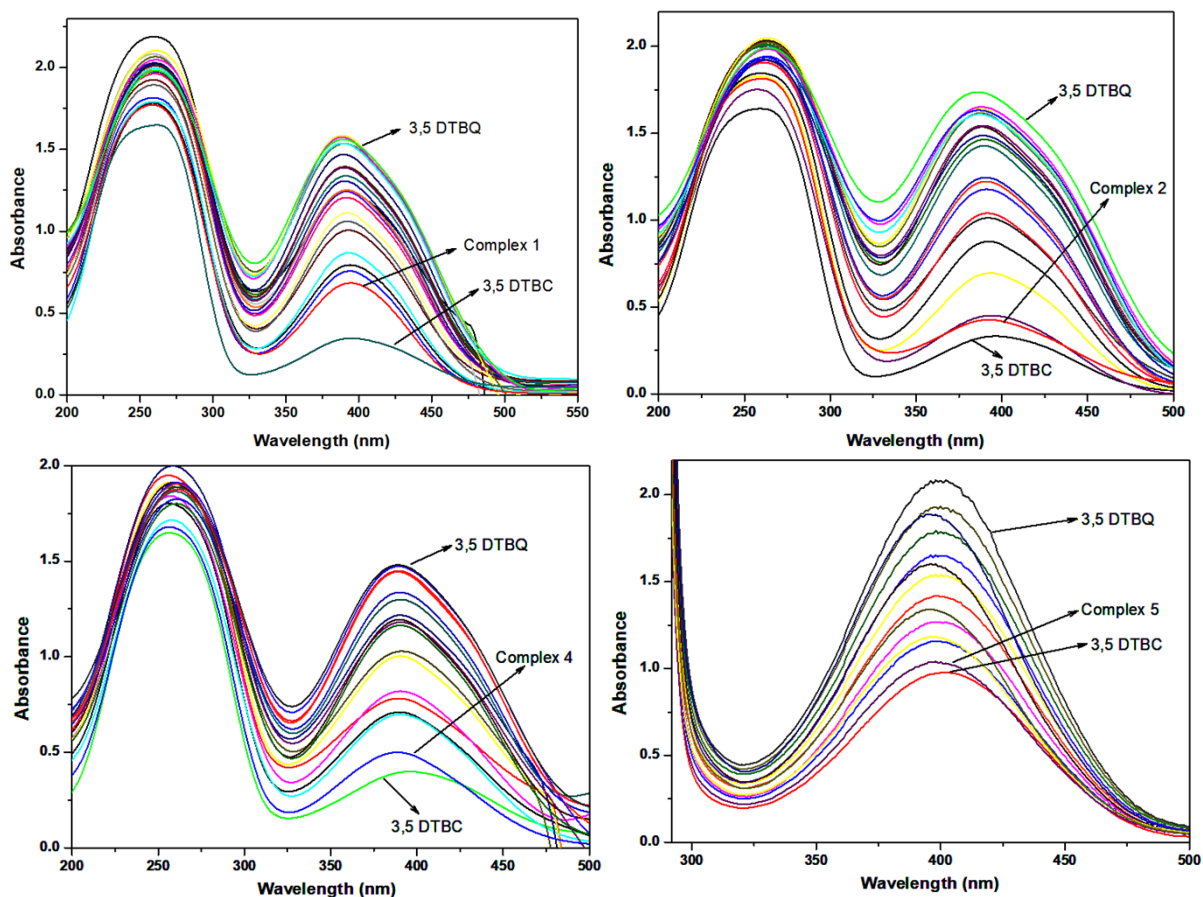

**Fig. S10.** Absorption variations of 3,5-DTBC after the addition of  $10^{-3}$  M concentration of complex 1, 2, 4 and 5 to 200 equivalents of DTBC dissolved in methanol with 5 min time interval.

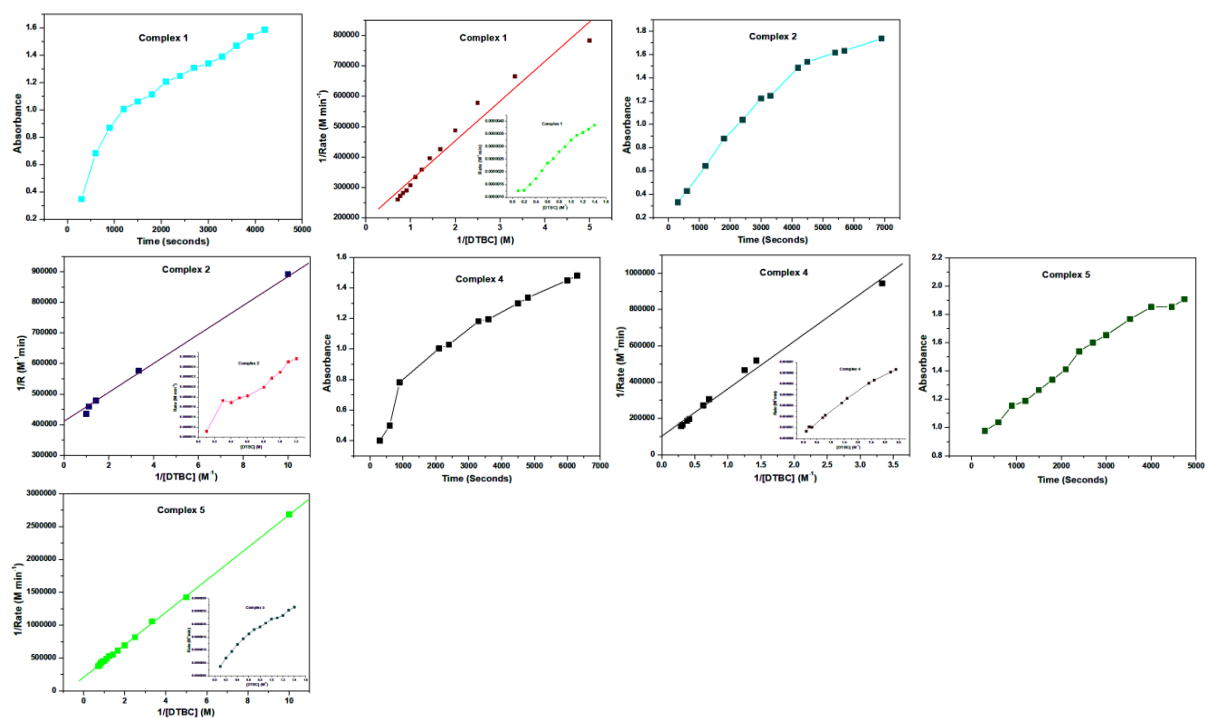

**Fig. S11.** Catalytic Reaction rate and Lineweaver-Burk plots for the oxidation of 3,5-DTBC catalysed by complex **1**, **2**, **4** and **5**

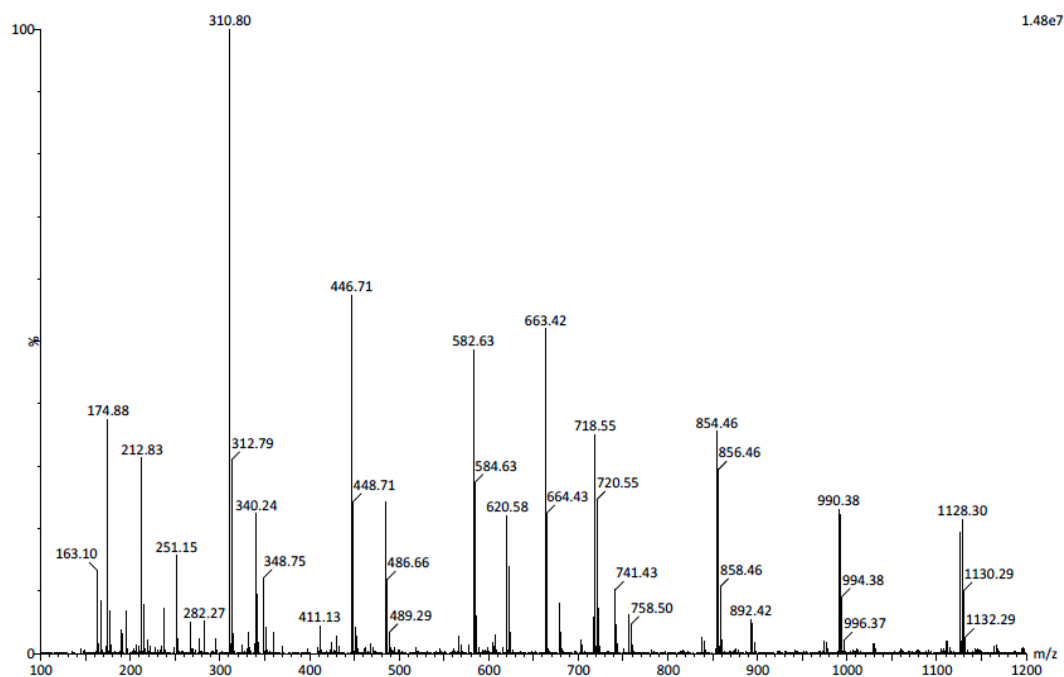

**Fig. S12.** ESI-MS spectrum of reaction mixture obtained after oxidation of 3,5-DTBC with catalyst **1**.

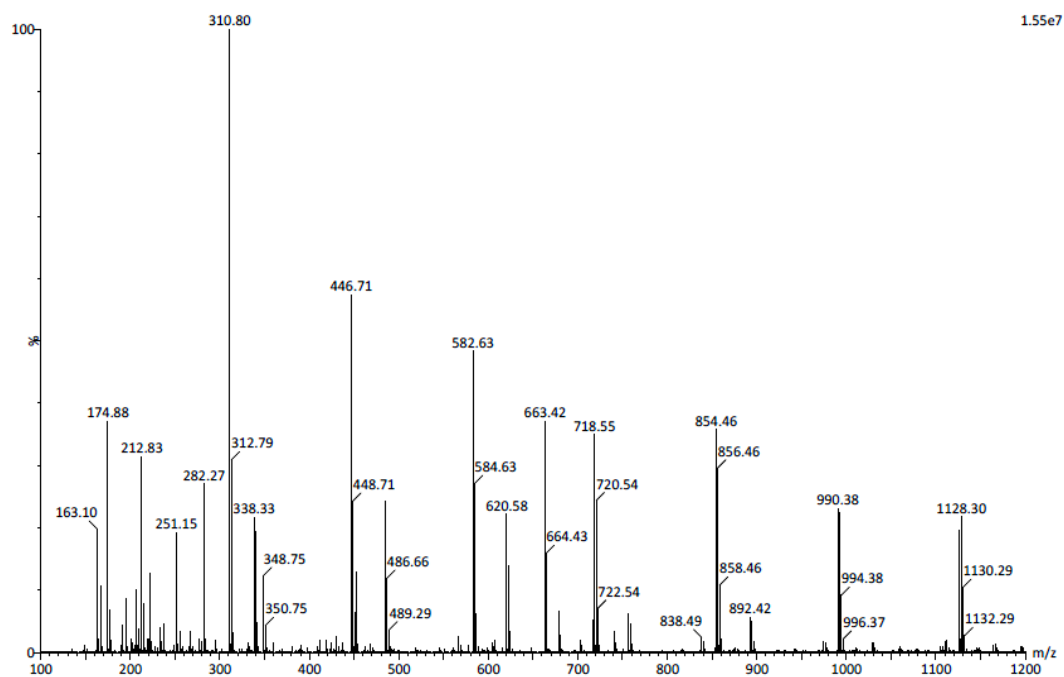

**Fig. S13.** ESI-MS spectrum of reaction mixture obtained after oxidation of 3,5-DTBC with catalyst 2.

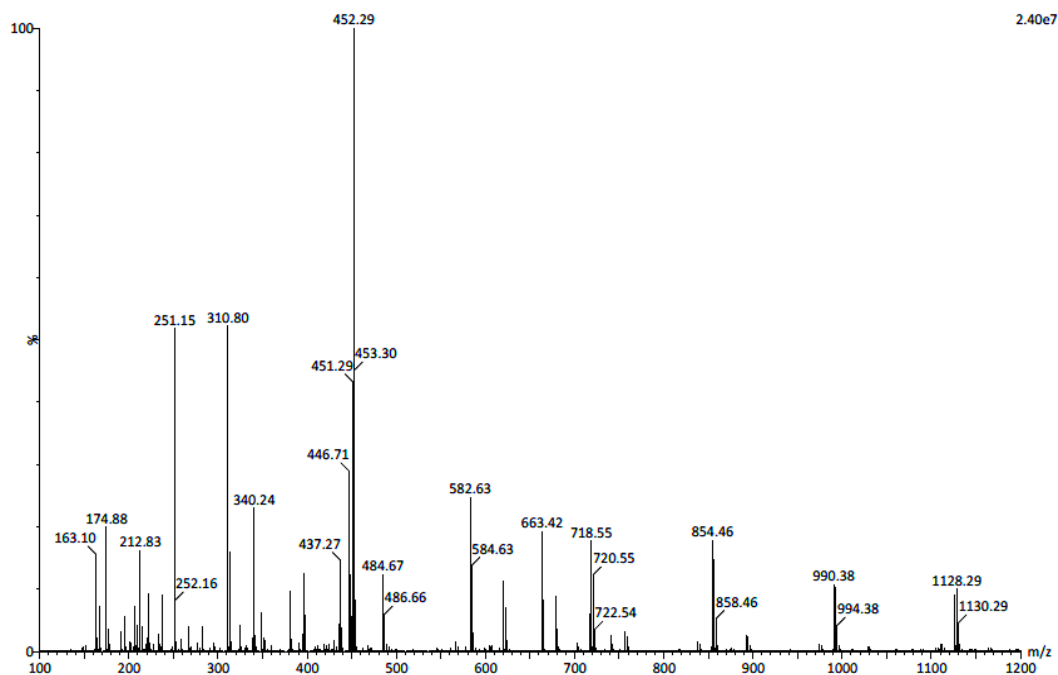

**Fig. S14.** ESI-MS spectrum of reaction mixture obtained after oxidation of 3,5-DTBC with catalyst 3.

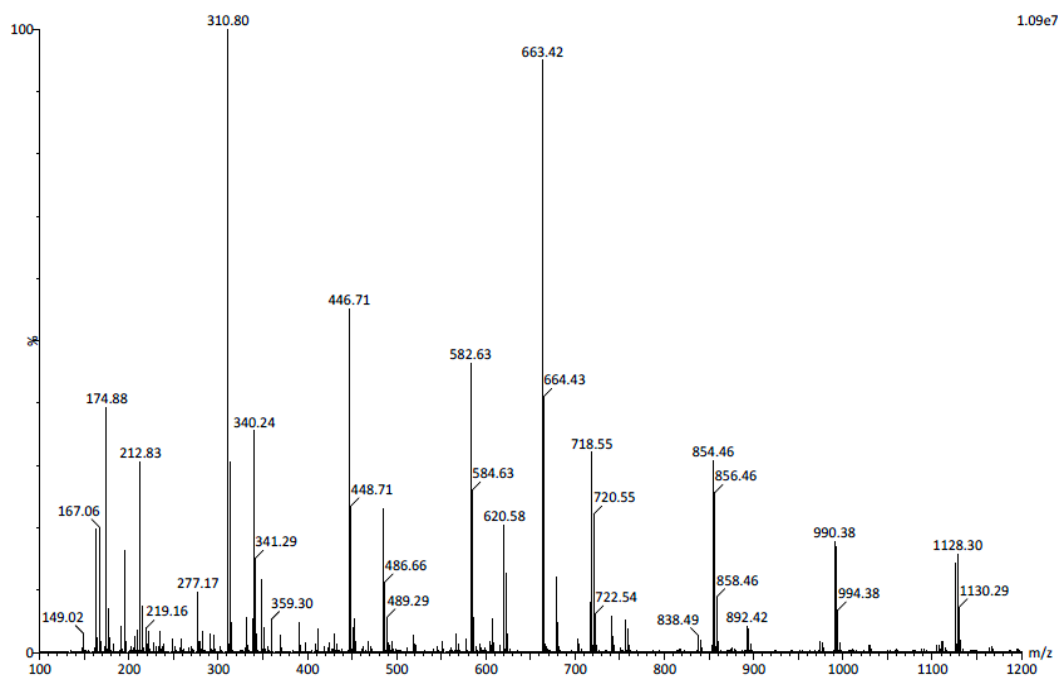

**Fig. S15.** ESI-MS spectrum of reaction mixture obtained after oxidation of 3,5-DTBC with catalyst 4.

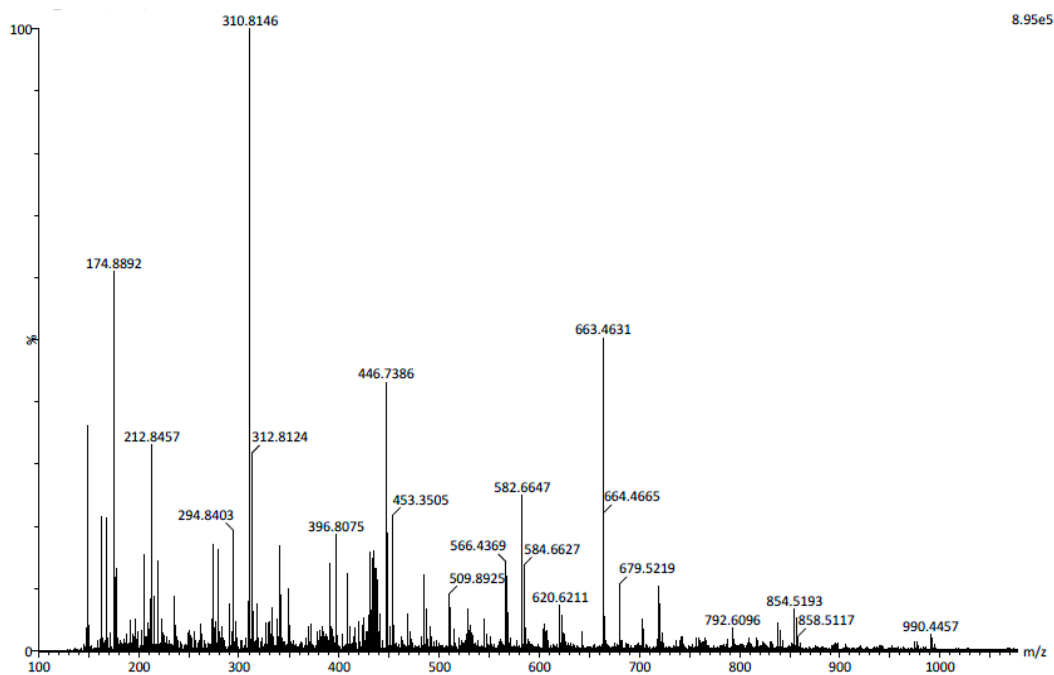

**Fig. S16.** ESI-MS spectrum of reaction mixture obtained after oxidation of 3,5-DTBC with catalyst **5**.

## References

- 1 H. Chebbi, M. Chebbi, A. Guesmi and Y. Arfaoui, *Journal of Structural Chemistry*, 2016, **57**, 1104–1110.
- 2 M. Alagesan, N. S. P. Bhuvanesh and N. Dharmaraj, *Dalton Transactions*, 2013, **42**, 7210–7223.
- 3 P. Sathyadevi, P. Krishnamoorthy, N. S. P. Bhuvanesh, P. Kalaiselvi, V. Vijaya Padma and N. Dharmaraj, *Eur J Med Chem*, 2012, **55**, 420–431.
- 4 APEX3, *BRUKER AXS Inc*, **5465**, WI 53711-5373 USA.
- 5 G. M. Sheldrick, WI 53711-5373 USA.
- 6 A. L. Spek, *J Appl Crystallogr*, 2003, **36**, 7–13.

- 7 O. V Dolomanov, L. J. Bourhis, R. J. Gildea, J. A. K. Howard and H. Puschmann, *J Appl Crystallogr*, 2009, **42**, 339–341.
- 8 G. M. Sheldrick, *Acta Crystallogr A*, 2008, **64**, 112–122.
